# Supplementary material
Source: publisher site journal article supplement (https://www.spandidos-publications.com/2692/downloadSupplementary)
Supplement: Supplementary file 1 [file downloadSupplementary]

## Sheet: Sheet1
Table S1. Clinicopathological data of all patients.
Patient number	Age	Clinical stage	Gleason score	Seminal vesicle invasion	Lymph node metastasis	Type
602649	63	T1	2	Absence	Absence	FFPE
602652	65	T1	5	Absence	Absence	FFPE
602664	66	T3	9	Presence	Presence	FFPE
602675	59	T1	5	Absence	Absence	FFPE
602698	48	T1	5	Absence	Absence	FFPE
602705	78	T3	8	Presence	Presence	FFPE
602711	46	T1	3	Absence	Absence	FFPE
602724	54	T2	8	Presence	Presence	FFPE
602831	70	T3	7	Presence	Presence	FFPE
602875	78	T3	8	Presence	Presence	FFPE
602937	59	T1	4	Absence	Absence	FFPE
602938	87	T3	9	Presence	Presence	FFPE
602984	64	T1	4	Absence	Absence	FFPE
603068	78	T2	8	Presence	Presence	FFPE
603074	60	T2	8	Presence	Presence	FFPE
603076	86	T3	7	Presence	Presence	FFPE
603101	65	T1	4	Absence	Absence	FFPE
603106	56	T2	5	Absence	Absence	FFPE
603132	65	T1	6	Absence	Absence	FFPE
603187	72	T3	8	Presence	Presence	FFPE
603230	48	T1	4	Absence	Absence	FFPE
603271	78	T3	9	Presence	Presence	FFPE
603327	62	T2	7	Presence	Presence	FFPE
603368	60	T1	6	Absence	Absence	FFPE
603397	72	T2	7	Presence	Presence	FFPE
603452	52	T1	4	Absence	Absence	FFPE
603460	70	T3	7	Presence	Presence	FFPE
603482	60	T2	7	Presence	Absence	FFPE
603500	85	T3	9	Presence	Presence	FFPE
603518	81	T3	8	Presence	Presence	FFPE
603551	52	T1	6	Absence	Absence	FFPE
603596	59	T1	2	Absence	Absence	FFPE
603632	47	T1	5	Absence	Absence	FFPE
603681	86	T3	9	Presence	Presence	FFPE
603709	84	T3	9	Presence	Presence	FFPE
603725	48	T1	4	Absence	Absence	FFPE
603765	82	T3	8	Presence	Presence	FFPE
603779	54	T1	6	Absence	Absence	FFPE
603802	46	T2	8	Presence	Absence	FFPE
603806	77	T3	8	Presence	Presence	FFPE
603844	45	T1	4	Absence	Absence	FFPE
603872	72	T3	7	Presence	Presence	FFPE
603949	65	T2	2	Absence	Absence	FFPE
603955	56	T1	2	Absence	Absence	FFPE
604037	87	T3	8	Presence	Presence	FFPE
604038	84	T2	7	Presence	Presence	FFPE
604053	84	T3	7	Presence	Presence	FFPE
604099	83	T3	9	Presence	Presence	FFPE
604116	67	T2	9	Presence	Presence	FFPE
604118	87	T3	7	Presence	Presence	FFPE
604157	74	T2	7	Presence	Presence	FFPE
604174	62	T2	2	Absence	Absence	FFPE
604198	51	T2	5	Absence	Absence	FFPE
604239	79	T3	9	Presence	Presence	FFPE
604245	61	T1	6	Absence	Absence	FFPE
604281	88	T3	7	Presence	Presence	FFPE
604326	46	T1	2	Absence	Absence	FFPE
604369	55	T2	7	Presence	Presence	FFPE
604378	72	T3	8	Presence	Presence	FFPE
604433	87	T3	9	Presence	Presence	FFPE
604436	81	T3	9	Presence	Presence	FFPE
604484	76	T3	8	Presence	Presence	FFPE
604559	87	T3	7	Presence	Presence	FFPE
604591	74	T2	8	Presence	Presence	FFPE
604595	81	T3	9	Presence	Presence	FFPE
604605	51	T1	4	Absence	Absence	FFPE
604722	67	T2	7	Presence	Presence	FFPE
604762	71	T3	9	Presence	Presence	FFPE
604793	69	T3	9	Presence	Presence	FFPE
604895	75	T3	8	Presence	Presence	FFPE
604900	45	T2	8	Presence	Presence	FFPE
604918	60	T1	3	Absence	Absence	FFPE
604938	76	T3	8	Presence	Presence	FFPE
604950	57	T1	5	Absence	Absence	FFPE
605093	61	T2	8	Presence	Absence	FFPE
605109	81	T2	9	Presence	Presence	FFPE
605111	51	T1	6	Absence	Absence	FFPE
605133	74	T3	9	Presence	Presence	FFPE
605157	54	T1	5	Absence	Absence	FFPE
605166	73	T3	9	Presence	Presence	FFPE
605260	46	T1	3	Absence	Absence	FFPE
605284	76	T3	7	Presence	Presence	FFPE
605302	75	T3	9	Presence	Presence	FFPE
605320	53	T2	5	Absence	Absence	FFPE
605430	46	T1	3	Absence	Absence	FFPE
605451	65	T3	9	Presence	Presence	FFPE
605492	51	T1	5	Absence	Absence	FFPE
605574	70	T3	7	Presence	Presence	FFPE
605612	84	T2	8	Presence	Presence	FFPE
605630	48	T2	8	Absence	Absence	FFPE
605658	45	T1	2	Absence	Absence	FFPE
605670	75	T3	8	Presence	Presence	FFPE
605672	65	T3	7	Presence	Presence	FFPE
605698	77	T3	9	Presence	Presence	FFPE
605754	64	T2	9	Presence	Absence	FFPE
605880	52	T2	9	Presence	Presence	FFPE
605888	72	T3	8	Presence	Presence	Fresh
605890	62	T3	7	Presence	Presence	Fresh
605899	80	T3	9	Presence	Presence	Fresh
605903	78	T3	9	Absence	Presence	Fresh
605908	59	T3	9	Presence	Presence	Fresh
605909	68	T2	9	Presence	Presence	Fresh
605915	68	T3	5	Absence	Absence	Fresh
605920	70	T3	7	Presence	Presence	Fresh
605939	72	T3	8	Absence	Absence	Fresh
605959	75	T2	8	Presence	Presence	Fresh
